# Supplementary material for: Identification and Validation of a Novel Major Quantitative Trait Locus for Plant Height in Common Wheat (Triticum aestivum L.)
Source: Front Genet. 2020 Oct 22;11:602495. doi: 10.3389/fgene.2020.602495 (PMC7642865; doi:10.3389/fgene.2020.602495)
Supplement: Supplementary Table 2 — The HC-genes in the QPh.sicau-4B interval and QPh.sicau-6D interval. [file Table_2.XLS]

## Sheet: Sheet1
Table S2 The HC-genes in the QPh.sicau-4B interval and QPh.sicau-6D interval
Gene table_wheat	Gene table_Arabidopsis	Gene name_Arabidopsis	Gene description_Arabidopsis	Gene table_rice	Gene name_rice	Gene description_rice	QTL
TraesCS4B02G036800	-	-	-	Os11g0568700	-	Conserved hypothetical protein	QPh.sicau-4B
TraesCS4B02G036900	AT3G08990	-	Protein yippee-like At3g08990	-	-	-
TraesCS4B02G037000	-	-	-	Os03g0698800	-	Ankyrin domain containing protein
TraesCS4B02G037100	AT4G22330	ATCES1	ATCES1	Os03g0698900	-	Alkaline phytoceramidase family protein
TraesCS4B02G037200	AT3G27640	-	Transducin/WD40 repeat-like superfamily protein	Os03g0699100	-	WD40 repeat-like domain containing protein
TraesCS4B02G037300	AT5G14520	PES	Pescadillo homolog	Os03g0699200	PES	BRCT domain containing protein
TraesCS4B02G037400	AT3G57610	PURA	Adenylosuccinate synthetase, chloroplastic	Os03g0699300	PURA2	Similar to Adenylosuccinate synthetase, chloroplast precursor (EC 6.3.4.4) (IMP-- aspartate ligase) (AdSS) (AMPSase)
TraesCS4B02G037700	AT1G55020	LOX1	Linoleate 9S-lipoxygenase 1	Os03g0700400	-	Lipoxygenase-3, Generation of stale flavo
TraesCS4B02G037800	AT1G55020	LOX1	Linoleate 9S-lipoxygenase 1	Os03g0700700	-	Similar to Lipoxygenase (Fragment)
TraesCS4B02G037900	AT1G55020	LOX1	Linoleate 9S-lipoxygenase 1	Os03g0700400	-	Lipoxygenase-3, Generation of stale flavo
TraesCS4B02G038000	AT1G55000	-	F-box protein At1g55000	Os03g0699600	-	Cyclin-like F-box domain containing protein
TraesCS4B02G038100	AT5G03280	EIN2	Ethylene-insensitive protein 2	Os03g0700800	-	Similar to EIN2
TraesCS4B02G038200	AT5G19820	emb2734	ARM repeat superfamily protein	Os03g0701000	-	Similar to HEAT repeat family protein, expressed
TraesCS4B02G038500	-	-	-	-	-	-
TraesCS4B02G038700	AT4G02725	-	At4g02725	Os03g0701300	-	Similar to predicted protein
TraesCS4B02G038800	-	-	-	-	-	-
TraesCS4B02G039000	AT3G06460	-	F24P17.4 protein	Os03g0701500	-	GNS1/SUR4 membrane protein family protein
TraesCS4B02G039100	-	-	-	Os03g0701600	-	Conserved hypothetical protein
TraesCS4B02G039200	-	-	-	-	-	-
TraesCS4B02G039300	AT2G40940	ERS1	Ethylene response sensor 1	Os03g0701700	ERS1	Similar to Ethylene receptor
TraesCS4B02G039400	AT1G60890	-	Phosphatidylinositol 4-phosphate 5-kinase	Os03g0701800	PIPK1	Phosphatidylinositol 4-phosphate 5-kinase, Regulation of heading, Regulation of floral induction gene
TraesCS4B02G040100	AT1G15200	-	Protein-protein interaction regulator family protein	Os03g0701900	-	Similar to Pinin/SDK/memA/ protein conserved region containing protein
TraesCS4B02G040400	AT2G22590	UGT91A1	UDP-glycosyltransferase 91A1	-	-	-
TraesCS4B02G040800	AT1G48230	-	Probable sugar phosphate/phosphate translocator At1g48230	Os03g0702700	-	Protein of unknown function DUF250 domain containing protein
TraesCS4B02G040900	AT3G26618	ERF1-3	ERF1-3	Os03g0702800	-	Similar to Eukaryotic peptide chain release factor subunit 1 (eRF1) (Eukaryotic release factor 1) (TB3-1) (Cl1 protein)
TraesCS4B02G041100	AT3G18070	BGLU43	Beta-glucosidase 43	Os03g0703000	BGLU7	Similar to Beta-glucosidase
TraesCS4B02G041200	AT3G18070	BGLU43	Beta-glucosidase 43	Os03g0703100	BGLU8	Similar to Beta-glucosidase
TraesCS4B02G041400	AT2G36930	-	Expressed protein	Os08g0564500	-	Zinc finger, U1-type domain containing protein
TraesCS4B02G041500	-	-	-	Os03g0703300	-	Calponin-like actin-binding domain containing protein
TraesCS4B02G041600	-	-	-	Os03g0703400	-	Similar to MAP3K beta 3 protein kinase (EC 2.7.1.37) (Fragment)
TraesCS4B02G041800	AT1G71940	-	SNARE associated Golgi protein family	Os03g0703900	-	SNARE associated Golgi protein domain containing protein
TraesCS4B02G041900	AT1G77750	RPS13	Small ribosomal subunit protein S13, mitochondrial	Os03g0704000	-	Similar to 30S ribosomal protein S13
TraesCS4B02G042000	AT3G26070	PAP4	Probable plastid-lipid-associated protein 4, chloroplastic	Os03g0704100	-	Similar to structural molecule
TraesCS4B02G042100	AT2G17900	SDG37	SET domain group 37	Os03g0704200	-	Zinc finger, MYND-type domain containing protein
TraesCS4B02G042300	AT2G31020	ORP1A	ORP1A	-	-	-
TraesCS4B02G042400	AT2G26420	PIP5K3	1-phosphatidylinositol-4-phosphate 5-kinase 3	Os03g0705300	-	Similar to 4,5 PIP kinase (Phosphatidylinositol-4-phosphate 5-kinase family protein)
TraesCS4B02G042500	-	-	-	Os03g0705800	-	Protein of unknown function DUF3049 domain containing protein
TraesCS4B02G042600	AT5G22330	RIN1	RuvB-like protein 1	Os07g0178900	-	Similar to ATTIP49A/RIN1 (RESISTANCE TO PSEUDOMONAS SYRINGAE PV MACULICOLA INTERACTOR 1); protein binding
TraesCS4B02G042900	AT1G73950	-	Transmembrane Fragile-X-F-associated protein	Os03g0706900	-	Zinc finger, RING-type domain containing protein
TraesCS4B02G043000	-	-	-	Os03g0707200	-	Similar to Integral membrane protein DUF6 containing protein, expressed
Rht1b	AT3G03450	RGL2	DELLA protein RGL2	Os03g0707600	SLR1	DELLA repressor protein, Gibberellin signalin
TraesCS4B02G043200	AT3G17970	OEP64	Outer envelope protein 64, chloroplastic	Os03g0707900	-	Similar to Toc64
TraesCS4B02G043300	AT2G06925	PLA2-ALPHA	PLA2-ALPHA	Os03g0708000	PLA2-III	Phospholipase A2 family protein
TraesCS4B02G043400	AT2G01490	PAHX	Phytanoyl-CoA dioxygenase	Os05g0473900	-	Phytanoyl-CoA dioxygenase family protein
TraesCS4B02G043600	AT1G73650	-	Protein of unknown function (DUF1295)	Os03g0708400	-	Protein of unknown function DUF1295 family protein
TraesCS4B02G043700	AT1G18170	FKBP17-2	Peptidyl-prolyl cis-trans isomerase FKBP17-2, chloroplastic	Os03g0708500	-	Capsid/spike protein, ssDNA virus domain containing protein
TraesCS4B02G043900	AT1G28180	-	P-loop containing nucleoside triphosphate hydrolases superfamily protein	Os03g0708600	-	DEAD-like helicase, N-terminal domain containing protein
TraesCS6D02G223400	AT3G53570	AFC1	Serine/threonine-protein kinase AFC1	Os01g0837900	-	Similar to Protein kinase AFC1 (EC 2.7.1.-)	QPh.sicau-6D
TraesCS6D02G223500	AT5G51170	-	U6 snRNA phosphodiesterase	Os02g0651000	-	Uncharacterised protein family UPF0406 domain containing protein
TraesCS6D02G223600	AT5G61670	OR	Protein ORANGE, chloroplastic	Os02g0651300	-	Similar to OR
TraesCS6D02G223700	-	-	-	-	-	-
TraesCS6D02G223800	AT5G61650	CYCU4-3	Cyclin-U4-3	Os02g0652000	-	PREG-like protein
TraesCS6D02G223900	AT2G44745	WRKY12	WRKY transcription factor 12	Os02g0652100	-	Similar to WRKY-like DNA-binding protein
TraesCS6D02G224000	AT3G60260	-	ELMO/CED-12 family protein	Os02g0652300	-	Engulfment and cell motility, ELM domain containing protein
TraesCS6D02G224100	AT5G47180	PVA21	Vesicle-associated protein 2-1	Os02g0652550	-	Similar to predicted protein
TraesCS6D02G224200	AT4G17560	-	50S ribosomal protein L19-1, chloroplastic	Os02g0652600	-	Ribosomal protein L19 family protein
TraesCS6D02G224300	AT4G17550	-	Putative glycerol-3-phosphate transporter 4	Os02g0652800	-	Major facilitator superfamily MFS_1 protein
TraesCS6D02G224500	-	-	-	Os02g0653200	-	Cupredoxin domain containing protein
TraesCS6D02G224600	AT5G02890	-	-	-	-	-
TraesCS6D02G224700	AT4G16820	PLA-I{beta]2	Phospholipase A1-Ibeta2, chloroplastic	Os02g0653900	-	Similar to Avr9/Cf-9 rapidly elicited protein 14 (Fragment)
TraesCS6D02G224800	AT4G16800	-	Probable enoyl-CoA hydratase 2, mitochondrial	Os02g0654000	-	Similar to Methylglutaconyl-CoA hydratase
TraesCS6D02G224900	AT4G16800	-	Probable enoyl-CoA hydratase 2, mitochondrial	Os02g0654100	-	Similar to Enoyl-CoA hydratase
TraesCS6D02G225000	AT5G40770	PHB3	Prohibitin-3, mitochondrial	Os02g0580500	-	Similar to Prohibitin
TraesCS6D02G225200	-	-	-	Os02g0654400	-	Transcription initiation factor TFIID component TAF4 domain containing protein
TraesCS6D02G225300	AT4G17510	UCH3	Ubiquitin carboxyl-terminal hydrolase 3	Os02g0654500	-	Peptidase C12, ubiquitin carboxyl-terminal hydrolase 1 family protein
TraesCS6D02G225500	AT5G47220	ERF2	ERF2	Os02g0654700	-	AP2/ERF family protein, Abiotic stress respons
TraesCS6D02G225700	-	-	-	Os02g0655200	-	Similar to Ap25
TraesCS6D02G225800	AT3G58990	IPMI1	3-isopropylmalate dehydratase small subunit 2	Os02g0655300	-	Similar to 3-isopropylmalate dehydratase, small subunit
TraesCS6D02G225900	AT4G17486	-	DeSI-like protein At4g17486	Os02g0655500	-	Protein of unknown function DUF862, eukaryotic domain containing protein
TraesCS6D02G226000	-	-	-	Os02g0655600	-	Protein of unknown function DUF676, hydrolase-like domain containing protein
TraesCS6D02G226100	-	-	-	Os01g0296700	-	Glycoside hydrolase, family 3, N-terminal domain containing protein
TraesCS6D02G226300	AT5G51290	CERK	Ceramide kinase	Os02g0656200	-	Similar to Ceramide kinase
TraesCS6D02G226500	AT5G07620	-	Protein kinase superfamily protein	Os02g0655800	-	Serine/threonine protein kinase domain containing protein
TraesCS6D02G226700	AT1G05940	CAT9	Cationic amino acid transporter 9, chloroplastic	Os02g0655700	-	Amino acid/polyamine transporter I family protein
TraesCS6D02G226800	AT2G23940	-	Expressed protein	Os02g0666800	-	Protein of unknown function DUF788 family protein
TraesCS6D02G226900	AT5G03555	NCS1	Purine-uracil permease NCS1	Os02g0666700	-	Permease for cytosine/purines, uracil, thiamine, allantoin family protein
TraesCS6D02G227000	AT1G08160	-	Uncharacterized protein At1g08160	Os02g0666600	-	Harpin-induced 1 domain containing protein
TraesCS6D02G227200	AT2G45970	CYP86A8	Cytochrome P450 86A8	Os02g0666500	-	Similar to Cytochrome P450
TraesCS6D02G227300	AT1G63700	YDA	Mitogen-activated protein kinase kinase kinase YODA	Os02g0666300	-	Similar to MAP3Ka
TraesCS6D02G227500	AT1G01620	PIP1-3	Aquaporin PIP1-3	Os02g0666200	PIP1-1	Aquaporin
TraesCS6D02G227600	AT4G10100	CNX7	Molybdopterin synthase sulfur carrier subunit	Os02g0558300	-	ThiamineS domain containing protein
TraesCS6D02G227700	AT5G61930	APO3	APO protein 3, mitochondrial	Os07g0600300	-	Protein of unknown function DUF794, plant family protein
TraesCS6D02G227900	AT2G45910	PUB33	U-box domain-containing protein 33	Os02g0665500	-	Similar to U-box domain containing protein, expressed
TraesCS6D02G228000	-	-	-	Os02g0665300	-	Peptidase S8, subtilisin-related domain containing protein
TraesCS6D02G228200	AT4G11440	-	Mitochondrial substrate carrier family protein	Os02g0665200	-	Mitochondrial substrate carrier family protein
TraesCS6D02G228300	-	-	-	Os02g0664700	P0461B08.8-1	Conserved hypothetical protein
TraesCS6D02G228700	-	-	-	-	-	-
TraesCS6D02G228800	-	-	-	Os02g0664000	-	Similar to Phospholipid hydroperoxide glutathione peroxidase, chloroplast precursor (EC 1.11.1.12) (PHGPx)
TraesCS6D02G229000	AT3G56460	-	GroES-like zinc-binding alcohol dehydrogenase family protein	Os05g0313500	-	Similar to oxidoreductase/ zinc ion binding protein
TraesCS6D02G229200	AT5G52360	ADF12	ADF10	Os02g0663800	ADF1	Actin depolymerizing factor, Actin-binding protein, Abiotic stress respons
TraesCS6D02G229400	AT3G60630	SCL22	Scarecrow-like protein 22	Os02g0663100	-	GRAS (GAI-RGA-SCR) plant-specific transcription factor, Maintenance of shoot apical meristem indeterminacy, Regulation of vegetative to reproductive phase chang
TraesCS6D02G229600	AT4G16510	-	YbaK/aminoacyl-tRNA synthetase-associated domain-containing protein	Os02g0662200	-	YbaK/aminoacyl-tRNA synthetase associated region domain containing protein
TraesCS6D02G229700	AT4G12550	AIR1	Putative lipid-binding protein AIR1	Os02g0662100	-	Similar to Tfm5 protein
TraesCS6D02G229800	AT4G00170	PVA13	Vesicle-associated protein 1-3	Os02g0661900	-	Similar to OSIGBa0143N19.13 protein
TraesCS6D02G229900	AT4G22550	LPPB	Probable lipid phosphate phosphatase beta	Os02g0661800	-	Phosphatidic acid phosphatase type 2/haloperoxidase domain containing protein
TraesCS6D02G230000	-	-	-	Os07g0477250	-	Similar to S-adenosylmethionine synthetase 2
TraesCS6D02G230100	-	-	-	Os07g0477250	-	Similar to S-adenosylmethionine synthetase 2
TraesCS6D02G230300	AT2G01818	-	PLATZ transcription factor family protein	Os02g0661400	P0516F12.12	Protein of unknown function DUF597 domain containing protein
TraesCS6D02G230500	-	-	-	Os02g0661100	TPP1	Similar to Trehalose-6-phosphate phosphatase
TraesCS6D02G230600	AT5G17550	PEX19-2	PEX19-2	Os02g0661000	-	Similar to peroxisomal biogenesis factor 19
TraesCS6D02G231000	AT3G24315	AtSec20	At3g24315	Os02g0658900	-	Sec20 family protein
TraesCS6D02G231100	AT5G07000	SOT14	Cytosolic sulfotransferase 14	-	-	-
TraesCS6D02G231200	AT1G65681	EXPB6	Expansin-B6	Os02g0658800	EXPB11	Beta-expansin
TraesCS6D02G231300	AT1G65681	EXPB6	Expansin-B6	-	-	-
TraesCS6D02G231400	AT1G65681	EXPB6	Expansin-B6	-	-	-
TraesCS6D02G231500	AT5G51370	-	F-box protein	Os02g0658500	OJ1112_F09.25-1	Similar to Leucine Rich Repeat family protein
TraesCS6D02G231700	-	-	-	-	-	-
TraesCS6D02G231800	-	-	-	Os02g0658300	-	Conserved hypothetical protein
TraesCS6D02G231900	-	-	-	Os02g0658200	-	Zinc finger, PHD-type domain containing protein
TraesCS6D02G232000	AT5G64730	-	Transducin/WD40 repeat-like superfamily protein	Os02g0543400	-	WD40 repeat-like domain containing protein
TraesCS6D02G232100	AT4G17340	TIP2-2	Probable aquaporin TIP2-2	-	-	-
TraesCS6D02G232200	AT5G47440	-	At5g47440	Os02g0658000	-	Pleckstrin-like domain containing protein
TraesCS6D02G232300	-	-	-	Os02g0657700	-	Uncharacterised conserved protein UCP012943 domain containing protein
TraesCS6D02G232400	AT3G57560	NAGK	NAGK	Os02g0657600	OsAGK2	N-acetyl glutamate kinase 2
TraesCS6D02G232600	-	-	-	Os02g0656500	-	DnaJ-like protein
TraesCS6D02G233000	AT2G44950	HUB1	E3 ubiquitin-protein ligase BRE1-like 1	Os04g0550400	HUB1	E3 ligases of H2Bub1, Transcriptional regulation of anther developmen
TraesCS6D02G233100	-	-	-	-	-	-
TraesCS6D02G233200	AT3G48150	APC8	Anaphase-promoting complex subunit 8	Os02g0656300	-	Similar to Anaphase-promoting complex subunit 8-like protein
TraesCS6D02G233400	AT1G76065	-	LYR family of Fe/S cluster biogenesis protein	Os02g0667000	-	Complex 1 LYR protein family protein
TraesCS6D02G233500	-	-	-	Os02g0667100	-	Conserved hypothetical protein
TraesCS6D02G233600	-	-	-	Os02g0667300	-	Alcohol dehydrogenase superfamily, zinc-containing protein
TraesCS6D02G233800	AT2G16970	MEE15	Major facilitator superfamily protein	Os02g0667500	-	Similar to tetracycline transporter protein
TraesCS6D02G234000	AT2G22690	-	At2g22690	-	-	-
TraesCS6D02G234100	AT3G14810	MSL5	Mechanosensitive ion channel protein 5	Os02g0668000	OJ1725_H08.12-1	Membrane protein, At2g17000, predicted domain containing protein
TraesCS6D02G234200	AT4G38460	GGR	Heterodimeric geranylgeranyl pyrophosphate synthase small subunit, chloroplastic	Os02g0668100	-	Similar to Geranylgeranyl-diphosphate synthase
TraesCS6D02G234300	AT1G76120	-	tRNA pseudouridine synthase	Os02g0668400	-	tRNA pseudouridine synthase family protein
TraesCS6D02G234400	AT4G35750	-	At4g35750	Os02g0668500	P0684A08.3-1	Cellular retinaldehyde-binding/triple function, C-terminal domain containing protein
TraesCS6D02G234600	-	-	-	Os02g0669000	-	Lipase, GDSL domain containing protein
TraesCS6D02G234700	-	-	-	Os02g0669100	DHN1	Dehydrin family protein
TraesCS6D02G234800	-	-	-	-	-	-
TraesCS6D02G234900	AT3G51390	PAT10	Protein S-acyltransferase 10	Os12g0480000	-	Zinc finger, DHHC-type domain containing protein
TraesCS6D02G235000	-	-	-	-	-	-
TraesCS6D02G235400	AT3G51880	HMGB1	high mobility group B1	Os02g0670400	-	Similar to HMGc1 protein
TraesCS6D02G235500	AT4G38250	AVT3C	Amino acid transporter AVT3C	Os02g0670900	-	Similar to amino acid transport protein
TraesCS6D02G235600	-	-	-	Os02g0671200	-	Protein of unknown function DUF295 domain containing protein
TraesCS6D02G235700	AT1G31050	-	basic helix-loop-helix (bHLH) DNA-binding superfamily protein	Os02g0671300	-	Basic helix-loop-helix dimerisation region bHLH domain containing protein
TraesCS6D02G235800	AT2G02080	IDD4	Protein indeterminate-domain 4, chloroplastic	Os04g0566400	-	Similar to INDETERMINATE-related protein 9
TraesCS6D02G235900	AT1G48410	AGO1	ICU9	Os02g0672200	AGO1A	Similar to AGO1 homologous protein
TraesCS6D02G236100	AT1G09290	-	Uncharacterized protein At1g09290 (Fragment)	Os02g0672400	-	Sugar transporter, conserved site domain containing protein
TraesCS6D02G236200	AT4G10760	MTA	N6-adenosine-methyltransferase MT-A70-like	Os02g0672600	-	Similar to N6-adenosine-methyltransferase 70 kDa subunit (EC 2.1.1.62) (MT-A70) (Methyltransferase-like protein 3). Splice isoform 2
TraesCS6D02G236300	-	-	-	-	-	-
TraesCS6D02G236400	-	-	-	Os02g0672800	WNK4	Similar to Protein kinase
TraesCS6D02G236500	AT4G00910	-	Aluminium activated malate transporter family protein	Os02g0673100	-	Aluminum-activated malate transporter, Maintenance of panicle size and grain yiel
TraesCS6D02G236600	AT1G64625	BHLH157	Transcription factor bHLH157	Os02g0673500	-	Basic helix-loop-helix dimerisation region bHLH domain containing protein
TraesCS6D02G236700	AT3G61850	DAG1	Dof-type zinc finger DNA-binding family protein	Os02g0673700	DOF2	Similar to OSIGBa0103M18.3 protein
TraesCS6D02G236800	-	-	-	Os02g0674233	P0657H12.23	Hypothetical conserved gene
TraesCS6D02G236900	AT3G61180	-	RING/U-box superfamily protein	Os02g0674700	-	Similar to protein binding protein
TraesCS6D02G237000	-	-	-	Os02g0674800	ROC5	Similar to OCL1 homeobox protein
TraesCS6D02G237200	AT2G45750	-	Probable methyltransferase PMT16	Os02g0675700	-	Protein of unknown function DUF248, methyltransferase putative family protein
TraesCS6D02G237300	AT3G61060	AtPP2-A13	Phloem protein 2-A13	Os02g0675800	-	Cyclin-like F-box domain containing protein
TraesCS6D02G237400	AT4G21010	-	Transcription initiation factor IIE subunit beta	Os10g0397200	-	Transcription initiation factor TFIIE, beta subunit domain containing protein
TraesCS6D02G237500	AT1G12640	LPLAT1	Lysophospholipid acyltransferase 1	Os02g0676000	-	Membrane bound O-acyl transferase, MBOAT family protein
TraesCS6D02G237700	-	-	-	Os02g0676500	-	Similar to OSIGBa0127A14.6 protein
TraesCS6D02G237800	AT5G52020	ERF025	Ethylene-responsive transcription factor ERF025	Os02g0676800	-	Similar to Dehydration responsive element binding protein 1E (DREB1E protein)
TraesCS6D02G237900	AT1G49780	PUB26	U-box domain-containing protein 26	Os02g0548700	-	Similar to ubiquitin-protein ligase
TraesCS6D02G238100	AT4G17410	-	DWNN domain, a CCHC-type zinc finger	Os10g0431000	-	Similar to predicted protein
TraesCS6D02G238200	AT4G25480	DREB1A	Dehydration-responsive element-binding protein 1A	Os02g0677300	DREB1G	Similar to CRT/DRE binding factor 1
TraesCS6D02G238300	AT5G62140	-	ATP-dependent Clp protease ATP-binding subunit	Os02g0677600	-	Conserved hypothetical protein
TraesCS6D02G238400	AT5G40880	ZFWD3	Uncharacterized protein At5g40880 (Fragment)	Os02g0677700	-	Similar to Nucleic acid binding protein
TraesCS6D02G238500	AT4G22990	-	Major Facilitator Superfamily with SPX (SYG1/Pho81/XPR1) domain-containing protein	Os02g0678200	-	SPX-MFS protein, Pi homeostasi
TraesCS6D02G238700	AT5G51950	-	AT5g51950/MSG15_3	Os02g0678300	-	Similar to protein HOTHEAD
TraesCS6D02G238800	AT1G63000	NRS/ER	Bifunctional dTDP-4-dehydrorhamnose 3,5-epimerase/dTDP-4-dehydrorhamnose reductase	Os02g0678400	-	NAD(P)-binding domain containing protein
